# Supplementary material for: Amidophosphine ligands as constructs for early–late heterobimetallic complexes; the formation of an anisotropic metallocage†
Source: Royal Society of Chemistry journal article supplement (doi:10.1039/b105698k), 2001-01-01
Supplement: b105698k.doc [file b105698k.doc]

# SUPPLEMENTARY MATERIAL

**Experimental Details**.

All reactions were carried out using standard Schlenk techniques under an atmosphere of nitrogen or in a nitrogen filled glove-box. Solvents were dried (Et2O-sodium benzophenone ketyl, hexane and pentane-NaK, toluene-Na), distilled and stored over K or 4 Å molecular sieves. Deuteriated benzene and toluene were vacuum distilled from K and deuteriated dichloromethane from CaH2. The compounds *m*-H2N(C6H4)PPh2,1 TiCl4(THF)2,2 and Pt(norbornene)3,3 were synthesised according to literature procedures; all other reagents were used as purchased. The 1H and 195Pt{1H} NMR spectra were recorded on a Bruker AMX-500 spectrometer operating at 500.13 and 107.02 MHz respectively, while 13C{1H} and 31P{1H} NMR spectra were recorded on a Bruker DPX-300 spectrometer operating at 75.47 and 121.49 MHz respectively. Internal deuteriated solvent served as an internal reference where possible, while 31P{1H} and 195Pt{1H} NMR spectra were referenced to P(OMe)3 at 142.0 ppm and using the frequency scale convention,4 respectively. Mass spectra were recorded as solid samples using a Kratos MS80RF spectrometer.

# Synthesis of *m*-(Me3Si)HN(C6H4)PPh2 (L) ‑ To a stirred solution of *m*-H2N(C6H4)PPh2 (0.5 g, 1.80 mmol) and DABCO (0.30 g, 2.70 mmol) in Et2O (15 mL) was added dropwise a solution of chlorotrimethylsilane (0.29 g, 2.70 mmol) in Et2O (10 mL). After the addition was complete, the reaction mixture was left to stir for 16 h at room temperature. The reaction mixture was then filtered by cannula and the solvents were removed under vacuum, yielding L as a pale yellow oil that solidified on standing at room temperature (0.24 g, 44 %).

Found: C, 72.22; H, 6.87; N, 4.13. C21H24NPSi requires: C, 72.17; H, 6.92; N, 4.01 %

δH (CDCl3) 7.45 (10 H, br.s, aryl-H), 7.20 (1H, m, aryl-H), 6.80 (1H, m, aryl-H), 6.70 (1H, m, aryl-H), 6.50 (1H, m, aryl-H), 0.21 (9H, s, Me3Si); δP (CDCl3) -4.78 ppm (s); m/z 349 (M+, 100 %).

# Synthesis of [TiCl(L)3], 1 – A solution of nBuLi in hexanes (2.5 *M*, 1.55 mL) was added dropwise to a stirred solution of L (1.35 g, 3.868 mmol) in Et2O (30 mL) at 0 °C. The resultant orange solution was stirred at room temperature for 0.5 h, cooled to 0 °C and added dropwise to a stirred slurry of TiCl4(THF)2 (0.43 g, 1.289 mmol) in Et2O at 0 °C. The resultant orange slurry was stirred at room temperature for 3 h, and then the solvents were evaporated under vacuum. The brown residues were extracted into hot (*ca*. 50 °C) hexane (2 x 30 mL), filtered through Celite® and the yellow filtrate evaporated to dryness under vacuum yielding 1, (0.903 g, 62 %) as a fluffy yellow solid.

Found: C, 66.76; H, 6.24; N, 3.58. C63H72ClN3P3Si3Ti requires: C, 66.90; H, 6.37; N, 3.71 %

δH (C6D6) 7.46 (12 H, m, *o*-H aryl), 7.10 (27 H, m, *m*/*p*-H aryl), 6.36 (3H, br.d, *J* 7.4 Hz, aryl bridge), 0.19 (27 H, s, SiMe3); δP (C6D6) – 3.73 (s); *m/z* 1128 (M+, 0.5), 869 (M+ - PPh2 – SiMe3, 10), 697 (M+ - **L** – Cl – PPh2 – SiMe2, 55), 349 (**L**, 100 %)

**Synthesis of [ClTi(L)3Pt], 2 –** To a stirred mixture of solid **1** (0.25 g, 0.222 mmol) and Pt(norbornene)3 (0.106 g, 0.222 mmol) was added toluene (10 mL) at –78 °C. The resultant yellow solution was allowed to warm to room temperature and stirred at this temperature for 16 h. After this time, the solvents were evaporated to *ca*. 1 mL volume and cooled to –20 °C, causing **2** to precipitate as a microcrystalline, orange solid. A further crop of **2** could be isolated by the addition of pentane to the toluene washings (total yield 0.201 g, 80 %). Orange prisms suitable for X-Ray diffraction were grown by the slow evaporation of a C6D6 solution of **2** in the glove box.

Found: C, 57.04; H, 5.19; N, 3.09. C63H69ClN3P3PtSi3Ti requires: C, 57.16; H, 5.25, N, 3.17 %

δH (500 MHz, CD2Cl2) 8.23 (1 H, br. s, H1), 7.34 (2 H, br. m, H5), 7.15 (1 H, t, *J*HH 7.6 Hz, H3), 7.08 (1 H, t, *J*HH 7.2 Hz, H7’), 6.96 (2 H, t, *J*HH 7.3 Hz, H6), 6.88 (1 H, t, *J*HH 7.4 Hz, H7), 6.85 (1 H, d, *J*HH 6.9 Hz, H2), 6.79 (2 H, br. m, H5’), 6.76 (1 H, br. m, H4), 6.67 (2 H, t, *J*HH 7.6 Hz, H6’); δC (CD2Cl2) 155.4 (m, 3*J*PC 16.5 Hz, C2), 144.0 (m, 1*J*PC 34.6, 3*J*PC 6.0 Hz, C7), 141.5 (m, 1*J*PC 34.6 Hz, C6), 139.6 (m, C7’), 136.2 (m, 2*J*PC 34.1 Hz, C1), 135.4 (m, C8), 134.3 (m, C8’), 132.1 (s, *J*PtC 25.9 Hz, C5), 130.4 (s, C10), 130.0 (br. s, C3), 129.7 (br. s, C9), 129.4 (s, C10’), 129.2 (br. s, C9’), 126.5 (s, C4); δP (CD2Cl2) 52.5 (s, *J*PtP 4468 Hz); δPt (C7D8) –4606 (q, 1*J*PtP 4468 Hz); *m/z* 1325 (M+, 18), 349 (**L**, 100 %)

**References.**

1. A. Hessler, O. Stelzer, H. Dibowski, K. Worm, F. P. Schmidtchen, *J. Org. Chem.*, 1997, **62**, 2362
2. L. E. Manzer, *Inorg. Synth.*, 1985, **21**, 135
3. J. L. Spencer, personal communication
4. P. S. Pregosin, *Annual Reports on NMR Spectroscopy*, 1986, **17**, 289

C (and H, *i.e.* H1 is located on C1) labelling scheme:
